# Supplementary material
Source: publisher site journal article supplement (https://www.spandidos-publications.com/890/downloadSupplementary)

Figure S1. Cell viabilities of CDDP, GL-CDDP-Cy5.5 and CD24-GL-CDDP-Cy5.5 were compared by an MTS assay. CDDP, GL-CDDP-Cy5.5 and CD24-GL-CDDP-Cy5.5 acted as a concentration dependent inhibitor of cell proliferation with an  $IC_{50}$  of 72.4, 78.7 and 76.7  $\mu$ M, respectively. There was no significant difference in chemotherapeutic sensitivity among CDDP, GL-CDDP-Cy5.5 and CD24-GL-CDDP-Cy5.5 in Caov-3 cell. CDDP (broken line, diamond), GL-CDDP-Cy5.5 (dotted line, square) and CD24-GL-CDDP-Cy5.5 (solid line, circle). CDDP, cisplatin.

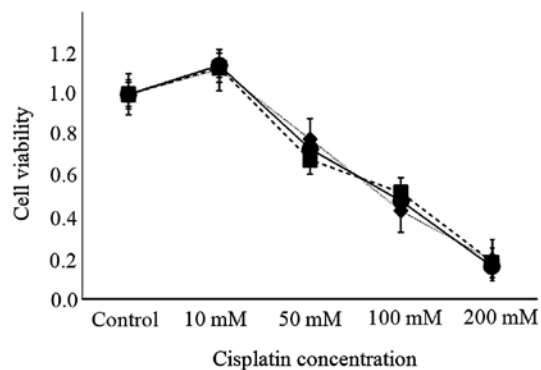

Supplement: Supplementary file 1 [file downloadSupplementary]
